# Supplementary material for: Combined impact of body mass index and glycemic control on the efficacy of clopidogrel-aspirin therapy in patients with minor stroke or transient ischemic attack
Source: publisher site journal article supplement (doi:10.18632/aging.103394), 2020-06-16
Supplement: Supplementary file [file aging-v12i12-103394-supplementary-material-SD1.pdf]

**SUPPLEMENTARY FIGURES**

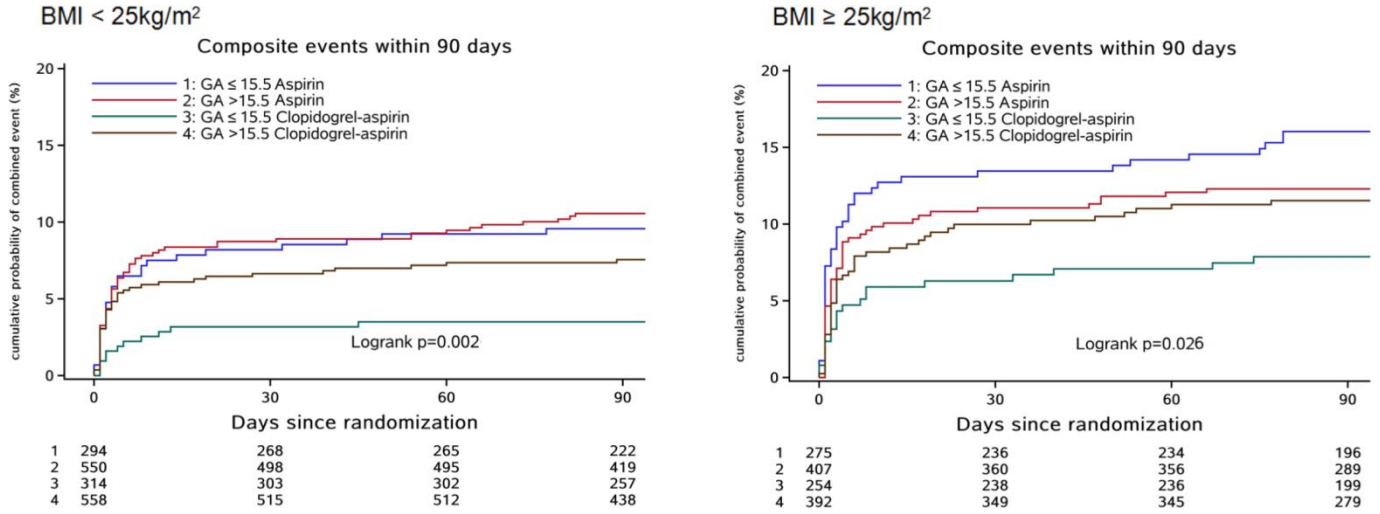

**Supplementary Figure 1. Cumulative probability of secondary efficacy outcomes (composite events) stratified by BMI status and GA levels.** Abbreviation: BMI, body mass index; GA, glycated albumin. Composite events were defined as a new clinical vascular event, including ischemic stroke, hemorrhagic stroke, myocardial infarction, or vascular death.

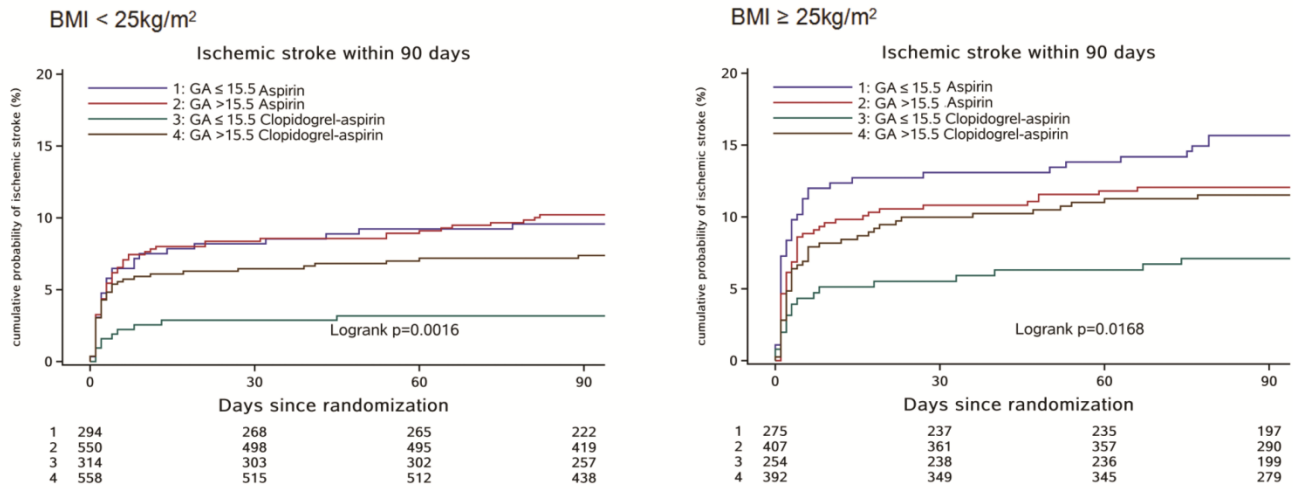

**Supplementary Figure 2. Cumulative probability of secondary efficacy outcomes (ischemic stroke) stratified by BMI status and GA levels.** Abbreviation: BMI, body mass index; GA, glycated albumin.

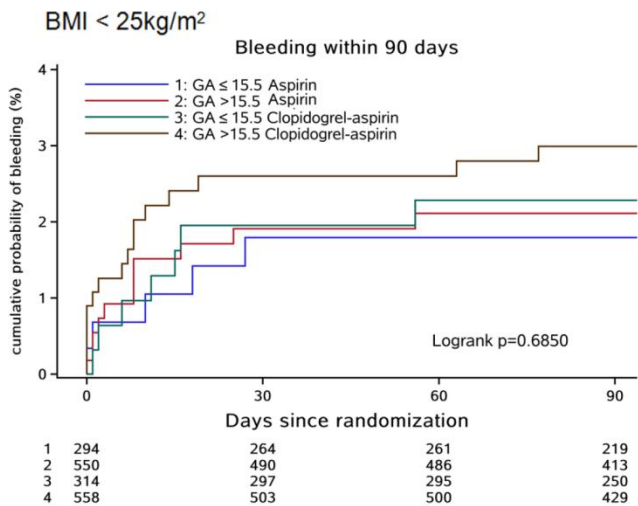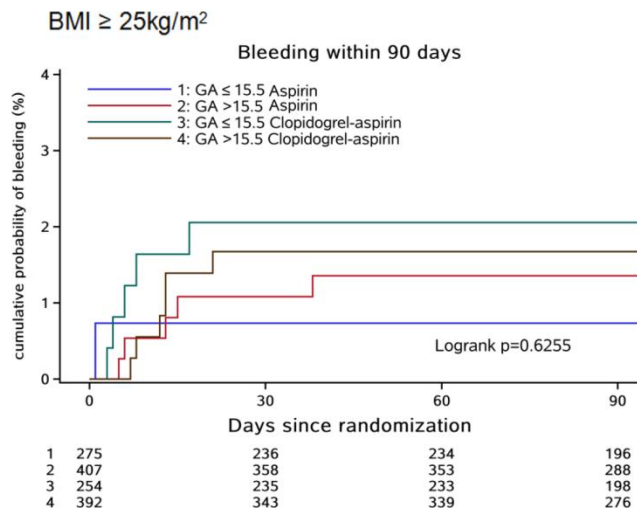

**Supplementary Figure 3. Cumulative probability of secondary efficacy outcomes (bleeding) stratified by BMI status and GA levels.** Abbreviation: BMI, body mass index; GA, glycated albumin. Bleeding was defined as any bleeding event according to the Global Utilization of Streptokinase and Tissue Plasminogen Activator for Occluded Coronary Arteries criteria.
